# Supplementary material for: MiR-30a-5p Inhibits Epithelial-to-Mesenchymal Transition and Upregulates Expression of Tight Junction Protein Claudin-5 in Human Upper Tract Urothelial Carcinoma Cells
Source: MDPI journal article supplement (doi:10.3390/ijms18081826), 2017-08-22
Supplement: s1 [file s1]

## Supplementary Tables

**Table S1.** Result of pathway enrichment analysis on the 38 genes differentially expressed in the 6 down-regulated miRNAs.

| Gene symbol of 38 up-regulated target genes |        |        |       |         |
|---------------------------------------------|--------|--------|-------|---------|
| ARID4B                                      | CASK   | CCNE2  | CDC7  | CDCA7   |
| CHD7                                        | CKS2   | E2F2   | EZH2  | FAM60A  |
| FBXO28                                      | GCLC   | GPR180 | GRHL2 | HMGB3   |
| HOOK1                                       | KCNK1  | KLF5   | KPNA2 | LPAR2   |
| LRRC8D                                      | MAP7   | MTDH   | MTF2  | PGK1    |
| PTPRK                                       | RAB3IP | RCN2   | SIX4  | SLC38A1 |
| SNRPD1                                      | SOX4   | SPCS3  | TAOK1 | TIA1    |
| TP63                                        | UCK2   | XPO1   |       |         |

**Table S2.** Result of pathway enrichment analysis on the 259 genes differentially expressed in the 16 up-regulated miRNAs.

| Gene symbol of 259 down-regulated target genes |           |         |          |          |
|------------------------------------------------|-----------|---------|----------|----------|
| ACACB                                          | ACTN1     | ACVRL1  | ADAMTS1  | ADAMTSL3 |
| ADCY9                                          | ADRB2     | AHNAK   | AKAP12   | ALAD     |
| ANGPTL2                                        | ANTXR2    | APOLD1  | ARHGAP20 | ARHGEF10 |
| ARL2                                           | ARRB1     | ATOH8   | ATP1A2   | ATP8B2   |
| ATP8B4                                         | AXL       | BIN1    | CALD1    | CAPN5    |
| CBX6                                           | CBX7      | CCDC28A | CCDC80   | CCDC92   |
| CCPG1                                          | CDC42EP2  | CDH11   | CDH5     | CGNL1    |
| CILP                                           | CLDN11    | CMTM7   | CNN1     | COL14A1  |
| COL15A1                                        | COL4A2    | COL5A1  | CORO1C   | CRY2     |
| CSF1R                                          | CTGF      | CX3CL1  | CXCL12   | CYR61    |
| CYYR1                                          | DAB2      | DCLK1   | DCUN1D3  | DDIT4    |
| DIXDC1                                         | DKK3      | DLL1    | DPYSL2   | DPYSL3   |
| DUSP1                                          | EBF1      | EBF3    | EDN1     | EDNRA    |
| EML1                                           | EMP1      | EMX2    | EPB41L2  | EPDR1    |
| ESR1                                           | F13A1     | FAM107A | FAM43A   | FAM46A   |
| FERMT2                                         | FGF9      | FLRT2   | FOSB     | FOXC1    |
| FOXD1                                          | FOXF1     | FRZB    | FSTL1    | FZD4     |
| G0S2                                           | GABARAPL1 | GABBR2  | GALNTL2  | GAS1     |
| GFPT2                                          | GHR       | GLIPR2  | GMDS     | GNE      |
| GNG7                                           | GPD1      | GPR116  | GPR124   | GPR162   |
| HABP4                                          | HEG1      | HES1    | HLF      | HOXC8    |

|          |         |            |        |           |
|----------|---------|------------|--------|-----------|
| HTR2A    | IL6     | INHBB      | ISLR   | ITGA9     |
| ITPRIP   | ITSN1   | JUNB       | KCTD12 | KIAA1210  |
| KLF2     | KLF4    | KLF6       | KLF9   | LAMA4     |
| LEPR     | LGALS1  | LIMS2      | LIPE   | LMOD1     |
| LOX      | LRP1    | LRRC17     | MAF    | MAP1A     |
| MAP1B    | MATN2   | MEF2C      | MFGE8  | MFNG      |
| MGLL     | MPRIP   | MRAS       | MSRB3  | MYADM     |
| MYH10    | MYH11   | MYLK       | NCALD  | NCOR2     |
| NFIA     | NFIX    | NGF        | NTF3   | NTM       |
| OAF      | OGN     | PALLD      | PAPPA  | PARM1     |
| PCDH18   | PCOLCE2 | PDE5A      | PDGFRA | PDGFRB    |
| PKD4     | PDPN    | PDZD4      | PHLDB1 | PI16      |
| PID1     | PIM1    | PKDCC      | PLCXD3 | PLEKHO2   |
| PLSCR4   | PMEPA1  | PPAP2B     | PRELP  | PRICKLE1  |
| PRICKLE2 | PROM1   | PRRX1      | PTPRN2 | RAB11FIP2 |
| RAB23    | RAB9B   | RASD1      | RASL12 | RASSF2    |
| RBPM5    | RECK    | REEP1      | RFTN1  | RFTN2     |
| RGL1     | RGS2    | RGS4       | RHOB   | RHOJ      |
| RNF150   | RRAD    | RSPO3      | SCARA3 | SCARA5    |
| SCN11A   | SCN4B   | SCRG1      | SDC2   | SERPINE1  |
| SH3D19   | SH3KBP1 | SH3PXD2A   | SHANK3 | SIDT2     |
| SIK1     | SLC24A3 | SLC2A3     | SLC7A2 | SLC9A9    |
| SOCS3    | SORBS1  | SORBS2     | SOX17  | SPRY1     |
| SRF      | SRL     | ST6GALNAC6 | STX2   | SULF2     |
| SVEP1    | SYDE1   | SYNPO2     | SYT11  | SYTL2     |
| TACC1    | TAGLN   | TCF21      | TCF4   | TGFB1     |
| TGFBR2   | THRSP   | TIMP2      | TIMP3  | TMOD1     |
| TNFSF13B | TNS1    | TP53INP2   | TPPP3  | TSC22D3   |
| TSHZ3    | TSKU    | TSPAN33    | TSPAN4 | TSPAN9    |
| VASN     | ZAK     | ZBTB20     | ZBTB47 | ZCCHC24   |
| ZDHHC14  | ZEB2    | ZFP36      | ZHX3   |           |

**Table S3. Clinical pathological characteristics of 22 patients with upper tract urothelial carcinoma.**

| Characteristic Variables | Number of patients ( <i>n</i> ) |
|--------------------------|---------------------------------|
| <b>Gender</b>            |                                 |
| Male                     | 9                               |
| Female                   | 13                              |

|                           |    |
|---------------------------|----|
| <b>Age</b>                |    |
| <60                       | 4  |
| ≥60                       | 18 |
| <b>Tumor status (TMN)</b> |    |
| T1-2                      | 12 |
| T3-4                      | 10 |
| N0                        | 15 |
| N1                        | 7  |
| M0                        | 9  |
| M1                        | 13 |
| <b>Grade</b>              |    |
| High                      | 17 |
| Low                       | 5  |
| <b>Tumor necrosis</b>     |    |
| Yes                       | 10 |
| no                        | 12 |
